# Supplementary material
Source: PubMed Central journal article supplement (PMC3474433)
Supplement: 12_055_Lu.Suppl.pdf [file 12_055_Lu.Suppl.pdf]

## Supplemental Data

# Isocorydine Targets the Drug-Resistant Cellular Side Population through PDCD4-Related Apoptosis in Hepatocellular Carcinoma

Ping Lu,<sup>1,2</sup> Hefen Sun,<sup>2</sup> Lixing Zhang,<sup>2</sup> Helei Hou,<sup>2</sup> Lin Zhang,<sup>2</sup> Fangyu Zhao,<sup>3</sup> Chao Ge,<sup>2</sup> Ming Yao,<sup>3</sup> Tingpu Wang,<sup>4</sup> and Jinjun Li<sup>2</sup>

Online address: <http://www.molmed.org>

The Feinstein Institute  
for Medical Research 

**Supplementary Table S1.** Antibodies used in this study

| Antibody                   | Clone, source                                    | Dilution             | Company                       |
|----------------------------|--------------------------------------------------|----------------------|-------------------------------|
| ABCG2                      | BXP-21, mouse mAb IgG <sub>2a</sub>              | 1:200 for WB and IF  | Santa Cruz (Santa Cruz, CA)   |
| Caspase 12                 | rabbit polyclonal                                | 1:1000 for WB        | Abcam (Cambridge, UK)         |
| Cleaved caspase 8(Asp 398) | 18C8, rabbit mAb                                 | 1:1000 for WB        | Cell Signaling (Danvers, MA)  |
| Caspase 8                  | D35G2, rabbit mAb                                | 1:1000 for WB        | Cell Signaling (Danvers, MA)  |
| Cleaved caspase 9(Asp 315) | rabbit mAb                                       | 1:200 for WB         | Cell Signaling (Danvers, MA)  |
| Caspase 9                  | rabbit mAb                                       | 1:1000 for WB        | Cell Signaling (Danvers, MA)  |
| Bcl2                       | 50E3, rabbit mAb                                 | 1:200 for WB         | Cell Signaling (Danvers, MA)  |
| Bcl-xl                     | 54H6, rabbit mAb                                 | 1:1000 for WB        | Cell Signaling (Danvers, MA)  |
| Mcl-1                      | D35A5, rabbit mAb                                | 1:1000 for WB        | Cell Signaling (Danvers, MA)  |
| Bad                        | D249A, rabbit mAb                                | 1:200 for WB         | Cell Signaling (Danvers, MA)  |
| Phosphor-Bad (Ser 112)     | 40A9, rabbit mAb                                 | 1:500 for WB         | Cell Signaling (Danvers, MA)  |
| Bax                        | 2D2, mouse mAb IgG1                              | 1:200 for WB         | Thermo Scientific             |
| Bik                        | rabbit mAb                                       | 1:1000 for WB        | Cell Signaling (Danvers, MA)  |
| Bim                        | C34C5, rabbit mAb                                | 1:1000 for WB        | Cell Signaling (Danvers, MA)  |
| Bak                        | D2D3, rabbit mAb                                 | 1:1000 for WB        | Cell Signaling (Danvers, MA)  |
| puma                       | rabbit, mAb                                      | 1:1000 for WB        | Cell Signaling (Danvers, MA)  |
| PDCD4                      | D29C6, rabbit mAb                                | 1:1000 for WB        | Cell Signaling (Danvers, MA)  |
| β -actin                   | AC-15, mouse mAb                                 | 1:30000 for WB       | Sigma (St. Louis, MO)         |
| Secondary antibody         | Alexa Fluor 488 goat anti-mouse                  | 1:200 for IF         | Invitrogen (Molecular Probes) |
| Secondary antibody         | HRP conjugated goat anti mouse IgG <sub>2a</sub> | 1:3000 for WB        | Sigma (St. Louis, MO)         |
| Secondary antibody         | HRP conjugated goat anti mouse IgG <sub>1</sub>  | 1:3000 for WB        | Sigma (St. Louis, MO)         |
| Secondary antibody         | HRP conjugated goat anti rabbit IgG              | 1:2000-1:5000 for WB | Cell Signaling (Danvers, MA)  |

IHC: Immunohistochemistry

IF: Immunofluorescence staining

WB: Western blotting

ISOCORYDINE TARGETS HCC SIDE POPULATION

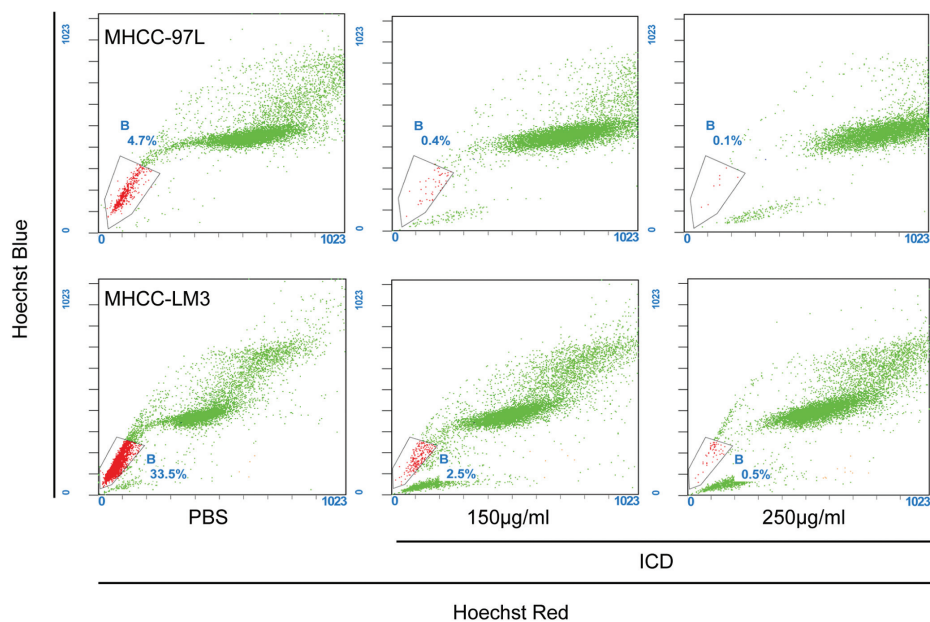

**Supplementary Figure S1.** Alteration of the SP fraction in HCC cell lines after treatment with ICD for 48 h. Representative flow cytometry histograms of SP cells in the MHCC-97L and MHCC-LM3 lines after treatment with 150 µg/ml or 250 µg/ml ICD for 48 h.

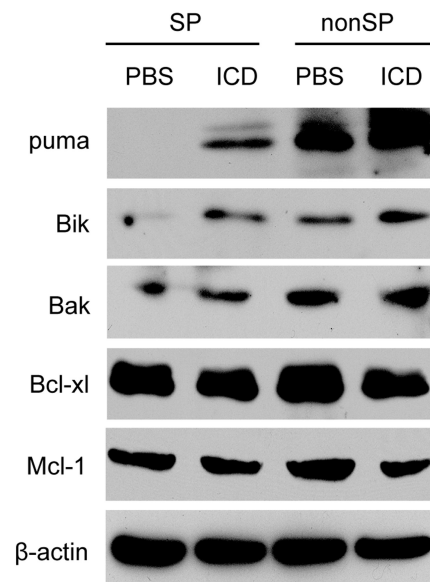

**Supplementary Figure S3.** The expression of apoptosis proteins in MHCC-97L-SP and non-SP cells treated with ICD. Western blotting of pro-apoptosis and anti-apoptosis proteins in SP and non-SP cells from the MHCC-97L line revealed altered expression after treatment with 150 µg/ml ICD for 24 h.

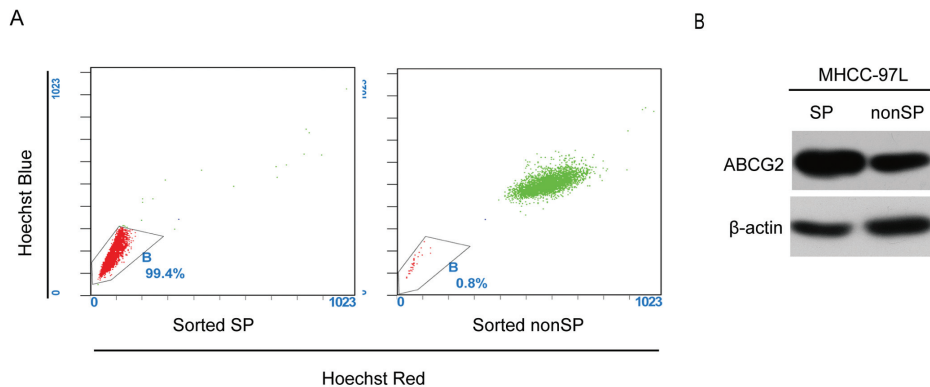

**Supplementary Figure S2.** Purity of SP sorting in MHCC-97L cells. (A) Cytometry plots of sorted MHCC-97L-SP and non-SP cells. (B) Western blotting of ABCG2 expression in sorted MHCC-97L and non-SP cells.
